# Supplementary material for: Zero internal concentration polarization FO membrane: functionalized graphene
Source: Royal Society of Chemistry journal article supplement (doi:10.1039/c3ta13562d), 2013-11-22
Supplement: c3ta13562d.pdf [file c3ta13562d.pdf]

## Zero Internal Concentration Polarization FO Membrane: Functionalized Graphene

Jing-Gang Gai\*, Xiao-Lei Gong, Xin Zhang

State Key Laboratory of Polymer Materials Engineering, Polymer Research Institute  
of Sichuan University, Chengdu, Sichuan 610065, China

### COMPASS force-field

The empirical function forms of the COMPASS force-field model are described  
as follows:

$$\begin{aligned} E_{total} = & \sum_b [k_2(b-b_0)^2 + k_3(b-b_0)^3 + k_4(b-b_0)^4] \\ & + \sum_\theta [k_2(\theta-\theta_0)^2 + k_3(\theta-\theta_0)^3 + k_4(\theta-\theta_0)^4] \\ & + \sum_\phi [k_1(1-\cos\phi) + k_2(1-\cos 2\phi) + k_3(1-\cos 3\phi)] \\ & + \sum_\chi k_2(\chi-\chi_0)^2 \\ & + \sum_{b,b'} k(b-b_0)(b'-b'_0) \\ & + \sum_{b,\theta} k(b-b_0)(\theta-\theta_0) \\ & + \sum_{b,\phi} (b-b_0)[k_1 \cos\phi + k_2 \cos 2\phi + k_3 \cos 3\phi] \\ & + \sum_{b,\phi} (\theta-\theta_0)[k_1 \cos\phi + k_2 \cos 2\phi + k_3 \cos 3\phi] \\ & + \sum_{\theta,\theta'} k(\theta-\theta_0)(\theta'-\theta'_0) \\ & + \sum_{\theta,\theta',\phi} k(\theta'-\theta'_0)(\theta-\theta_0)(\phi-\phi_0) \\ & + \sum_{i,j} \frac{q_i q_j}{r_{ij}} \\ & + \sum_{i,j} \epsilon_{ij} \left[ 2 \left( \frac{r_{ij}^0}{r_{ij}} \right)^9 - 3 \left( \frac{r_{ij}^0}{r_{ij}} \right)^6 \right] \end{aligned} \quad (1)$$

\*Corresponding authors. Tel.: +86 28 85467166; fax: +86 28 85402465. E-mail addresses:  
[gaijinggang@scu.edu.cn](mailto:gaijinggang@scu.edu.cn) (J-G. Gai)

where,  $E_b$ ,  $E_\theta$ ,  $E_\phi$ , and  $E_\chi$  are the valence terms for bond, angle, torsion, and out-of-plane angle coordinates, respectively, and  $E_{bb}$ ,  $E_{b\theta}$ ,  $E_{b\phi}$ ,  $E_{\theta\theta}$ , and  $E_{\theta\theta\phi}$  are the cross-coupling terms between internal coordinates.  $q_i$  and  $q_j$  denote the atom charges. The nonbonded terms are described by a Coulombic term for the electrostatic interactions and by a Lennard-Jones 9-6 (L-J) potential for the vdW interaction. These L-J parameters including  $\varepsilon$  and  $r^0$  for like atom pairs are adjustable parameters. For unlike atom pairs, these off-diagonal parameters are calculated by a sixth-order combination law which is given by,

$$\begin{aligned} r_{ij}^0 &= \left( \frac{(r_{ii}^0)^6 + (r_{jj}^0)^6}{2} \right)^{\frac{1}{6}}, \\ \varepsilon_{ij} &= 2\sqrt{\varepsilon_{ii}\varepsilon_{jj}} \left[ \frac{(r_{ii}^0 r_{jj}^0)^3}{(r_{ii}^0)^6 + (r_{jj}^0)^6} \right] \end{aligned} \quad (2)$$

where,  $r_{ij}$  is the inter-atom distance. For further information about the COMPASS force-field, please see ref [1,2].

## References

- [1] Compass by Accelrys used Materials Studio and Cerius2 software package. <http://accelrys.com/>.
- [2] Sun, H. *J. Phys. Chem. B* **1998**, *102*, 7338–7364.
